# Supplementary material for: Biochar for pollution mitigation and renewable energy applications toward sustainability development
Source: Royal Society of Chemistry journal article supplement (doi:10.1039/d5ra09050d), 2026-01-01
Supplement: d5ra09050d1.pdf [file d5ra09050d1.pdf]

## SUPPLEMENTARY DATA

### Biochar for Pollution Mitigation and Renewable Energy Applications toward Sustainability Development

**Table S1.** Characteristics, advantages, and disadvantages of the pyrolysis process

| Pyrolysis           | Characteristics                                                                                                                                                                                                       | Advantages                                                                                                                                                                                                                                  | Disadvantages                                                                                                                                                                                   | Ref.   |
|---------------------|-----------------------------------------------------------------------------------------------------------------------------------------------------------------------------------------------------------------------|---------------------------------------------------------------------------------------------------------------------------------------------------------------------------------------------------------------------------------------------|-------------------------------------------------------------------------------------------------------------------------------------------------------------------------------------------------|--------|
| Slow pyrolysis      | <ul style="list-style-type: none"> <li>• Temperature: 300–700°C</li> <li>• Residence time: &lt;2 s</li> <li>• Yield of biochar: 35%</li> </ul>                                                                        | <ul style="list-style-type: none"> <li>• High yield</li> <li>• Stable and rigid structure</li> <li>• High porosity</li> <li>• Cost-efficient</li> <li>• Biomass diversity</li> </ul>                                                        | <ul style="list-style-type: none"> <li>• Long residence</li> <li>• Low energy product</li> <li>• Time-consuming</li> <li>• Feedstock preparation</li> <li>• Emissions release</li> </ul>        | [1]    |
| Fast pyrolysis      | <ul style="list-style-type: none"> <li>• Temperature: 500–1000 °C</li> <li>• Residence time: hour-day</li> <li>• Yield of biochar: 12%</li> </ul>                                                                     | <ul style="list-style-type: none"> <li>• Short residence</li> <li>• High carbon content</li> <li>• High porosity</li> <li>• Rapid process</li> <li>• Biomass diversity</li> </ul>                                                           | <ul style="list-style-type: none"> <li>• Energy requirement</li> <li>• Low biochar yield</li> <li>• Emission control requirement</li> </ul>                                                     | [2, 3] |
| Catalytic pyrolysis | <ul style="list-style-type: none"> <li>• The presence of selective catalysts</li> <li>• Common catalysts: metal oxides, mesoporous solid catalysts, noble metal catalysts, molecular sieve catalysts, etc.</li> </ul> | <ul style="list-style-type: none"> <li>• Short duration</li> <li>• Quick heating and pyrolysis of the material</li> <li>• Higher energy saving</li> <li>• High-quality pyrolysis product</li> <li>• Improved the conversion rate</li> </ul> | <ul style="list-style-type: none"> <li>• Need catalyst support</li> <li>• Cost of catalysts (e.g., precious metals)</li> <li>• Technical complexity</li> <li>• Feedstock sensitivity</li> </ul> | [4, 5] |

|                            |                                                                                                                                                  |                                                                                                                                                                                                 |                                                                                                                                                                                    |       |
|----------------------------|--------------------------------------------------------------------------------------------------------------------------------------------------|-------------------------------------------------------------------------------------------------------------------------------------------------------------------------------------------------|------------------------------------------------------------------------------------------------------------------------------------------------------------------------------------|-------|
| Hydrothermal carbonization | <ul style="list-style-type: none"> <li>• Temperature: 180–300°C</li> <li>• Residence time: 1–16 h</li> <li>• Yield of biochar: 50–80%</li> </ul> | <ul style="list-style-type: none"> <li>• Effective method</li> <li>• It can operate at low temperatures</li> <li>• High surface functionality</li> <li>• Potential energy generation</li> </ul> | <ul style="list-style-type: none"> <li>• Required pressurized, expensive (high-cost), and complex systems</li> <li>• Feedstock limitations</li> <li>• High energy input</li> </ul> | [6-8] |
|----------------------------|--------------------------------------------------------------------------------------------------------------------------------------------------|-------------------------------------------------------------------------------------------------------------------------------------------------------------------------------------------------|------------------------------------------------------------------------------------------------------------------------------------------------------------------------------------|-------|

**Table S2.** The feature characteristics of biochar synthesized in various sources [9]

| Parameters               | Feedstocks                                                                                                                                      |                                                               |                                                            |                                  |
|--------------------------|-------------------------------------------------------------------------------------------------------------------------------------------------|---------------------------------------------------------------|------------------------------------------------------------|----------------------------------|
|                          | Aquatic                                                                                                                                         | Plant                                                         | Manure                                                     | Municipal solid                  |
| Features                 | Protein, lignocellulose, more inorganic compositions, and water                                                                                 | Lignocellulose, numerous quantities, broad distribution space | High nutrients (N, P, and K), more inorganic compositions. | Heavy metal appearance, moisture |
| Yield biochar            | High                                                                                                                                            | Low                                                           | High                                                       | High                             |
| Density                  | -                                                                                                                                               | Small                                                         | Middle                                                     | High                             |
| Pore morphology          | High porosity                                                                                                                                   | Long structure                                                | Honey-comb structure                                       | Layers or sheets structure       |
| Cation exchange capacity | Low                                                                                                                                             | High                                                          | Low                                                        | Low                              |
| pH value                 | Rising with high temperature                                                                                                                    |                                                               |                                                            |                                  |
| Specific surface area    | Low                                                                                                                                             | High                                                          | Low                                                        | Low                              |
| <i>Porosity</i>          | 400-700 °C ranges have high lignin – low ash compositions and outstanding porosity.<br><br>Rising with high temperature as temperature < 800 °C |                                                               |                                                            |                                  |

**Table S3.** Physiochemical characterizations of various biochars

| Feedstocks          | Temp<br>(°C) | Physical                                            |                                          |                      | Chemical |      |      |      |            | Ref. |
|---------------------|--------------|-----------------------------------------------------|------------------------------------------|----------------------|----------|------|------|------|------------|------|
|                     |              | Electrical<br>conductivity<br>(dS m <sup>-1</sup> ) | SSA<br>(m <sup>2</sup> g <sup>-1</sup> ) | Pore<br>size<br>(nm) | pH       | C/N  | O/C  | H/C  | Ash<br>(%) |      |
| Digestate           | 400          | 4.5                                                 | 4                                        | 10                   | 10.6     | 23.5 | 0.23 | 0.68 | 28.7       | [10] |
| Pepper stalk        | 600          | 0.16                                                | 71.3                                     | 3.2                  | 10.8     | 32.9 | 0.09 | 0.32 | 10.6       | [11] |
| Sewage<br>sludge    | 300          | -                                                   | 57.7                                     | -                    | 6.5      | 8    | 0.19 | 0.12 | -          | [12] |
| Pine<br>sawdust     | 650          | -                                                   | 130                                      | -                    | 9.6      | 260  | -    | 0.05 | -          | [13] |
| Bamboo              | 200          | -                                                   | 9.3                                      | 14.8                 | 5.18     | 133  | 0.67 | 0.11 | 0.95       | [14] |
| Activated<br>sludge | 500          | 0.47                                                | 41.8                                     | -                    | 8.01     | 5.49 | -    | 0.07 | 66.5       | [15] |
| Rice husk           | 600          | -                                                   | -                                        | -                    | 9.45     | 77.4 | 0.26 | 0.61 | 27.6       | [16] |
| Fruitwood           | 900          | -                                                   | -                                        | -                    | 8.63     | 208  | 0.07 | 0.47 | 5.49       | [17] |

**Table S4.** Capacitive deionization performance of biochar-based materials under different CDI architectures.

| Architecture | Concentration                     | Material                                                | SAC<br>(mg/g)           | CE<br>(%) | Remarks                                                                                     | Ref. |
|--------------|-----------------------------------|---------------------------------------------------------|-------------------------|-----------|---------------------------------------------------------------------------------------------|------|
| Traditional  | 160 $\mu\text{S cm}^{-1}$<br>NaCl | Chitin-derived<br>biochar                               | 11.4                    | 87.2      | 26.5 $\text{mg g}^{-1}$ at 500 $\mu\text{S cm}^{-1}$                                        | [18] |
|              | 10 mM NaCl                        | Algae-derived<br>biochar                                | 8.7                     | 75        | Higher SAC and CE when used as cathode                                                      | [19] |
|              | 1000 ppm<br>NaCl                  | Coconut shell-<br>biochar/ $\alpha$ -<br>$\text{MnO}_2$ | 68.4                    | 23.8      | 19.5% ion removal at 1000 ppm after 120 min                                                 | [20] |
|              | 824 ppm                           | $\text{CoCO}_3\text{O}_4/n$ -<br>doped CNTs             | 60.1                    |           | 85.6% SAC retention after 20 cycles                                                         | [21] |
| MCDI         | 1000 ppm                          | Activated<br>carbon                                     | -                       | 90.3      | Investigated effect of oil in brackish feedwater                                            | [22] |
|              | 600 ppm<br>NaCl                   | SCBFA-<br>derived<br>biochar                            | 22                      | 95        | 19 $\text{mg g}^{-1}$ SAC retained after 70 cycles                                          | [23] |
|              | 10 ppm                            | Activated<br>carbon                                     | -                       | 99.2      | 10 $\text{M}\Omega\text{ cm}$ UPW obtainable at 1.5V                                        | [24] |
| Portable     | 1500 TDS                          | Activated<br>carbon                                     | 75-<br>80% <sup>+</sup> | -         | 1.89 $\text{kWh m}^{-3}$ at 7 $\text{L min}^{-1}$ , prefers higher flow rates for better CE |      |

Notes: SAC – salt adsorption capacity, CE – charge efficiency, CNTs – carbon nanotubes, SCBFA – sugarcane bagasse fly ash UPW – ultra-pure water, TDS – total dissolved solids

## References

- [1] F. Rego, H. Xiang, Y. Yang, J.L. Ordovás, K. Chong, J. Wang, A. Bridgwater, Investigation of the role of feedstock properties and process conditions on the slow pyrolysis of biomass in a continuous auger reactor, *J. Anal. Appl. Pyrol.* 161 (2022) 105378.
- [2] K.B. Cantrell, P.G. Hunt, M. Uchimiya, J.M. Novak, K.S. Ro, Impact of pyrolysis temperature and manure source on physicochemical characteristics of biochar, *Bioresour. Technol.* 107 (2012) 419-428.
- [3] C. Chang, Z. Liu, P. Li, X. Wang, J. Song, S. Fang, S. Pang, Study on products characteristics from catalytic fast pyrolysis of biomass based on the effects of modified biochars, *Energy* 229 (2021) 120818.
- [4] H. Guo, X. Qin, S. Cheng, B. Xing, D. Jiang, W. Meng, H. Xia, Production of high-quality pyrolysis product by microwave-assisted catalytic pyrolysis of wood waste and application of biochar, *Arab. J. Chem.* 16 (2023) 104961.
- [5] X. Yang, B. Cao, D. Jiang, S. He, C. Yuan, H. Li, S.R. Naqvi, S. Wang, Catalytic pyrolysis of guaiacol on Enteromorpha-based biochar: A combination of experiments and density functional theory, *Fuel Process. Technol.* 239 (2023) 107527.
- [6] A. Funke, F. Ziegler, Hydrothermal carbonization of biomass: a summary and discussion of chemical mechanisms for process engineering, *Biofuels, Bioproducts and Biorefining* 4 (2010) 160-177.
- [7] B. Ercan, K. Alper, S. Ucar, S. Karagoz, Comparative studies of hydrochars and biochars produced from lignocellulosic biomass via hydrothermal carbonization, torrefaction and pyrolysis, *J. Energy Inst.* 109 (2023) 101298.
- [8] M. Sevilla, A.B. Fuertes, The production of carbon materials by hydrothermal carbonization of cellulose, *Carbon* 47 (2009) 2281-2289.
- [9] Y. Li, M. Kumar Awasthi, R. Sindhu, P. Binod, Z. Zhang, M.J. Taherzadeh, Biochar preparation and evaluation of its effect in composting mechanism: A review, *Bioresource Technology* 384 (2023) 129329.
- [10] M. Stefaniuk, P. Oleszczuk, Characterization of biochars produced from residues from biogas production, *J. Anal. Appl. Pyrol.* 115 (2015) 157-165.
- [11] J. Lee, X. Yang, S.-H. Cho, J.-K. Kim, S.S. Lee, D.C.W. Tsang, Y.S. Ok, E.E. Kwon, Pyrolysis process of agricultural waste using CO<sub>2</sub> for waste management, energy recovery, and biochar fabrication, *Appl. Energy* 185 (2017) 214-222.
- [12] S. Ren, M. Usman, D.C.W. Tsang, S. O-Thong, I. Angelidaki, X. Zhu, S. Zhang, G. Luo, Hydrochar-facilitated anaerobic digestion: Evidence for direct interspecies electron transfer mediated through surface oxygen-containing functional groups, *Environ. Sci. Technol.* 54 (2020) 5755-5766.
- [13] N.M.S. Sunyoto, M. Zhu, Z. Zhang, D. Zhang, Effect of biochar addition on hydrogen and methane production in two-phase anaerobic digestion of aqueous carbohydrates food waste, *Bioresour. Technol.* 219 (2016) 29-36.
- [14] U. Choe, A.M. Mustafa, H. Lin, J. Xu, K. Sheng, Effect of bamboo hydrochar on anaerobic digestion of fish processing waste for biogas production, *Bioresour. Technol.* 283 (2019) 340-349.
- [15] C. Yin, Y. Shen, R. Yuan, N. Zhu, H. Yuan, Z. Lou, Sludge-based biochar-assisted thermophilic anaerobic digestion of waste-activated sludge in microbial electrolysis cell for methane production, *Bioresour. Technol.* 284 (2019) 315-324.
- [16] J. Zhang, F. Lü, C. Luo, L. Shao, P. He, Humification characterization of biochar and its potential as a composting amendment, *J. Environ. Sci.* 26 (2014) 390-397.
- [17] F. Lü, C. Luo, L. Shao, P. He, Biochar alleviates combined stress of ammonium and acids by firstly enriching *Methanosaeta* and then *Methanosarcina*, *Water Res.* 90 (2016) 34-43.

- [18] P. Li, T. Feng, Z. Song, Y. Tan, W. Luo, Chitin derived biochar for efficient capacitive deionization performance, *RSC Adv.* 10 (2020) 30077-30086.
- [19] B. Li, X. Liu, A. Wang, C. Tan, K. Sun, L. Deng, M. Fan, J. Cui, J. Xue, J. Jiang, D. Yao, Biochar with inherited negative surface charges derived from *Enteromorpha prolifera* as a promising cathode material for capacitive deionization technology, *Desalination* 539 (2022) 115955.
- [20] J. Adorna, M. Borines, V.D. Dang, R.-A. Doong, Coconut shell derived activated biochar–manganese dioxide nanocomposites for high performance capacitive deionization, *Desalination* 492 (2020) 114602.
- [21] X. Hu, X. Min, X. Li, M. Si, L. Liu, J. Zheng, W. Yang, F. Zhao, Co-Co<sub>3</sub>O<sub>4</sub> encapsulated in nitrogen-doped carbon nanotubes for capacitive desalination: Effects of nano-confinement and cobalt speciation, *J. Colloid Interface Sci.* 616 (2022) 389-400.
- [22] Y.-J. Kim, J. Hur, W. Bae, J.-H. Choi, Desalination of brackish water containing oil compound by capacitive deionization process, *Desalination* 253 (2010) 119-123.
- [23] J.J. Lado, R.L. Zornitta, I. Vázquez Rodríguez, K. Malverdi Barcelos, L.A.M. Ruotolo, Sugarcane Biowaste-Derived Biochars as Capacitive Deionization Electrodes for Brackish Water Desalination and Water-Softening Applications, *ACS Sustain. Chem. Eng.* 7 (2019) 18992-19004.
- [24] J.-H. Lee, J.-H. Choi, The production of ultrapure water by membrane capacitive deionization (MCDI) technology, *J. Membr. Sci.* 409-410 (2012) 251-256.
